# Supplementary material
Source: PubMed Central journal article supplement (PMC10405296)
Supplement: NIHMS1921590-supplement-supplementary_material.pdf [file NIHMS1921590-supplement-supplementary_material.pdf]

# **Phosphatidylcholine and Phosphatidylserine Uniquely Modify the Secondary Structure of Alpha-Synuclein Oligomers Formed in Their Presence at the Early Stages of Protein Aggregation**

Tianyi Dou<sup>1</sup> and Dmitry Kurouski\*<sup>1,3</sup>

1. Department of Biochemistry and Biophysics, Texas A&M University, College Station, Texas 77843, United States

2. Department of Biomedical Engineering, Texas A&M University, College Station, Texas, 77843, United States

dkurouski@tamu.edu

## Supporting Information

- S1. AFM images and height profile of  $\alpha$ -Syn oligomers
- S2. Height profile of  $\alpha$ -Syn oligomers formed in the presence of lipid LUVs
- S3. AFM image and AFM-IR map of  $\alpha$ -Syn oligomers
- S4. Averaged AFM-IR spectra of  $\alpha$ -Syn oligomers
- S5. Averaged AFM-IR spectra of  $\alpha$ -Syn oligomers formed in the presence of lipid LUVs
- S6. Peak fitting for AFM-IR spectra
- S7. Bar plot of protein secondary structure of  $\alpha$ -Syn,  $\alpha$ -Syn:PC,  $\alpha$ -Syn:PS oligomers
- S8. Mean and standard deviation of  $\alpha$ -Syn:PC and  $\alpha$ -Syn:PS AFM-IR spectra on D2, D8 and D15
- S9. CD spectra for  $\alpha$ -Syn,  $\alpha$ -Syn:PC and  $\alpha$ -Syn:PS aggregates on D2, D8 and D15
- S10. FT-IR spectra of  $\alpha$ -Syn,  $\alpha$ -Syn:PC and  $\alpha$ -Syn:PS aggregates on D2, D8 and D15

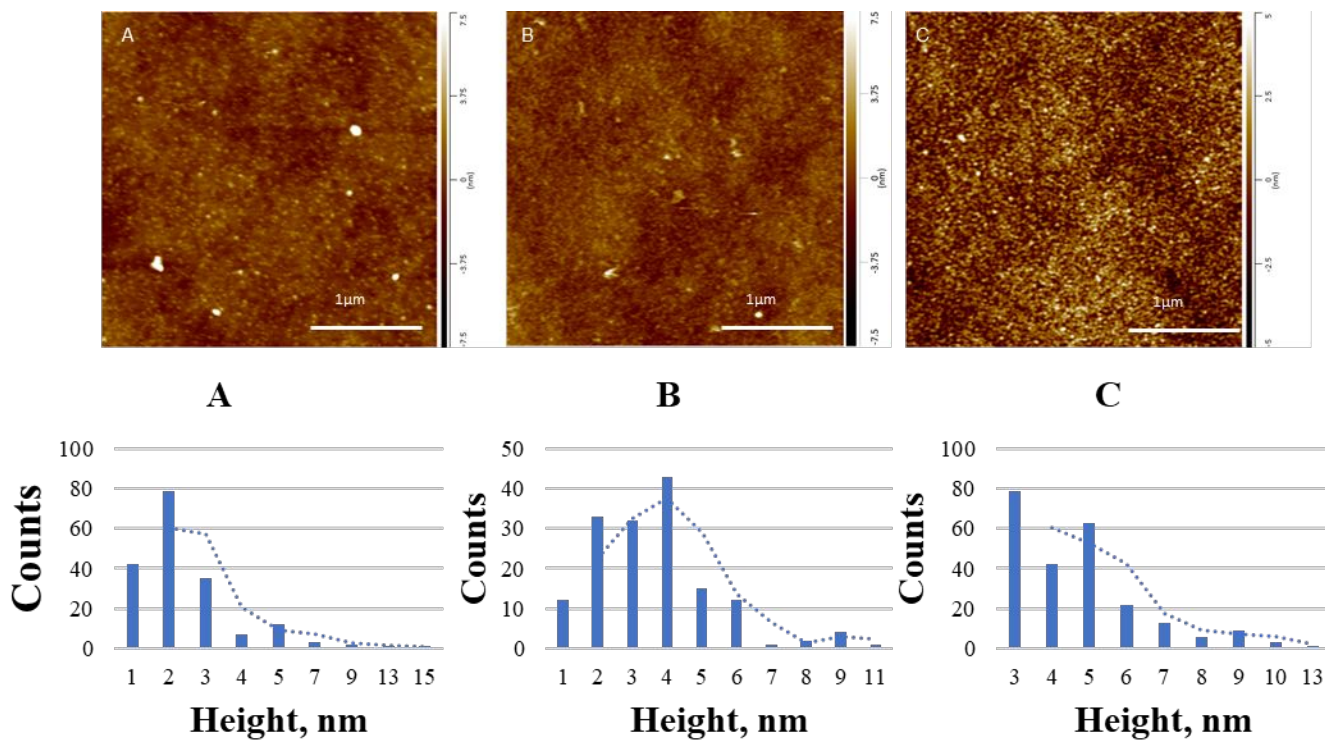

Figure S1. AFM images of  $\alpha$ -Syn aggregates formed at day 2 (A), day8 (B) and day15 (C). Height profiles of  $\alpha$ -Syn aggregates formed at day2 (D), day8 (E), and day 15 (F). Height profile of  $\alpha$ -Syn aggregates formed at day 2 (A), day8 (B) and day15 (C).

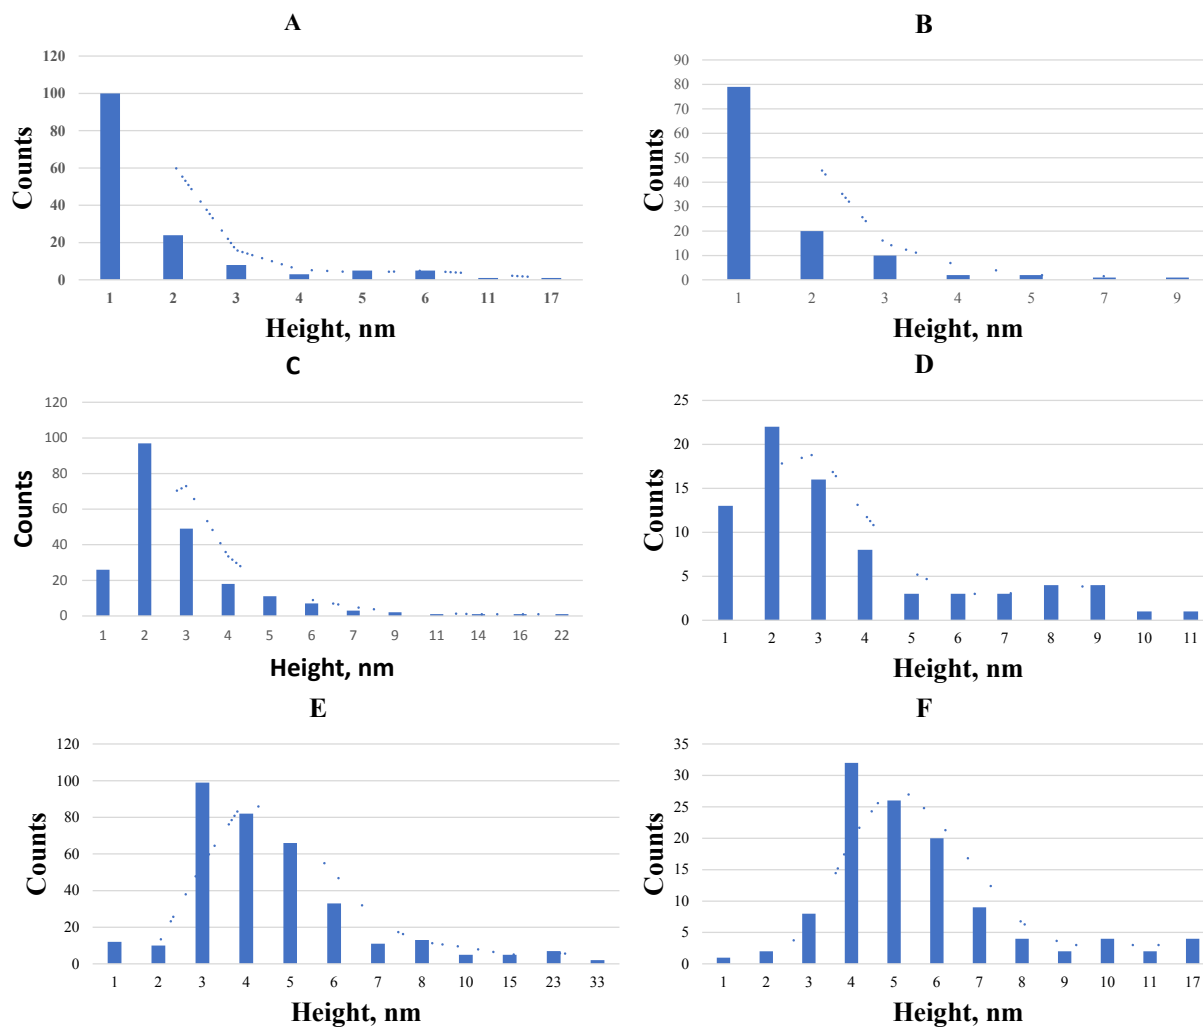

Figure S2. Height profiles of  $\alpha$ -Syn:PC (A, C and E) and  $\alpha$ -Syn:PS (B, D and F) oligomers observed at D2 (A-B), D8 (C-D) and D15 (E-F).

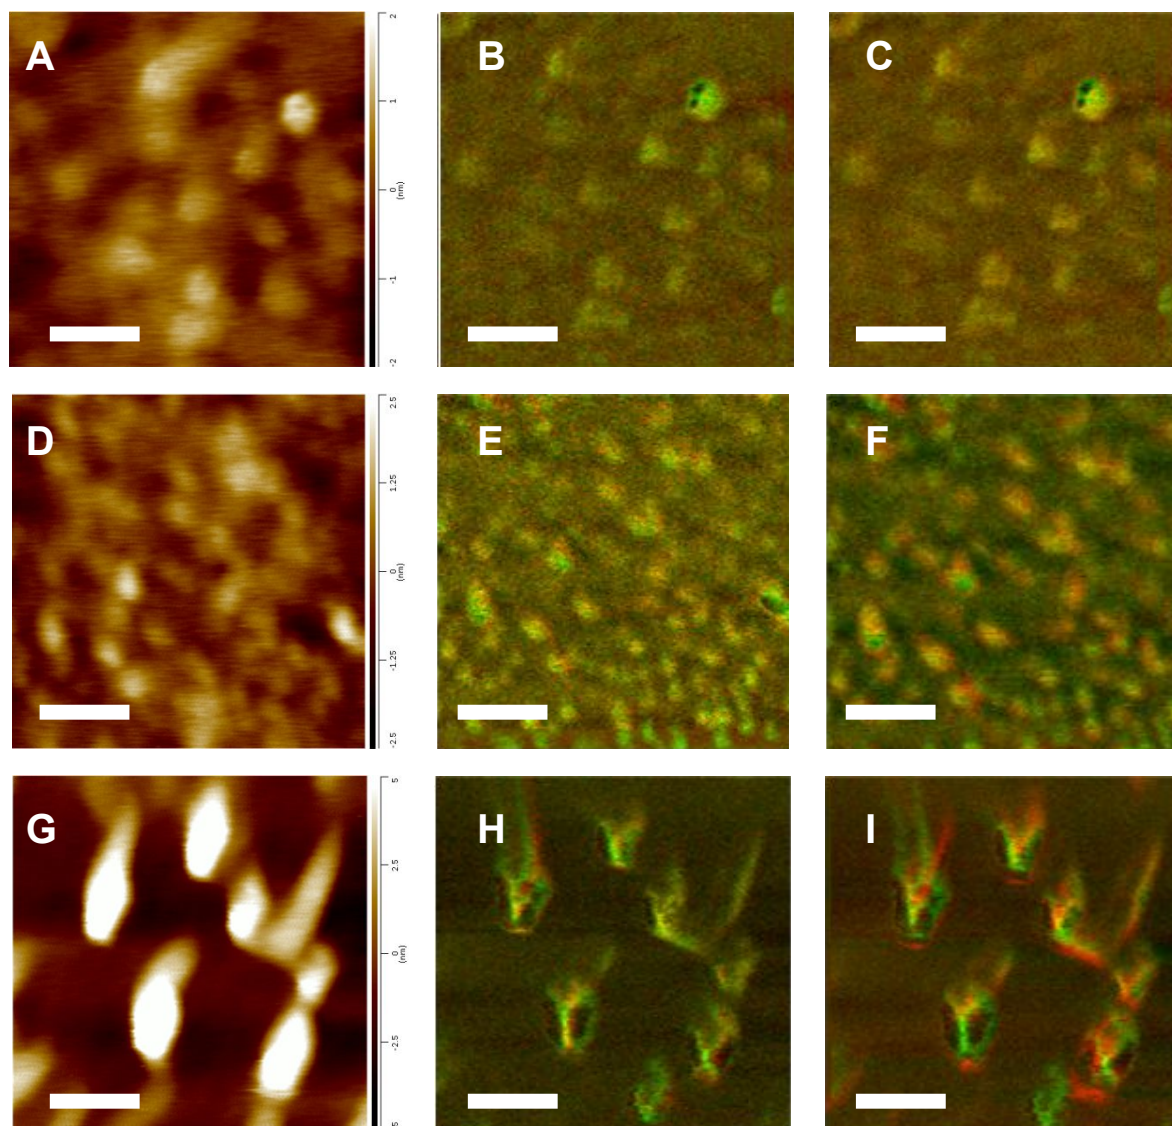

Figure S3. AFM-IR maps of  $\alpha$ -Syn oligomers formed at D2 (A-C), D8 (D-F) and D15 G-I) in the lipid-free environment. AFM height images (A, D, G), IR ratio overlaying map of  $1624\text{ cm}^{-1}$  (parallel  $\beta$ -sheet) (green) and  $1655\text{ cm}^{-1}$  ( $\alpha$ -helix/unordered protein secondary structure) (red) (B, E, H), and overlaying map of  $1624$  (parallel  $\beta$ -sheet) and  $1694\text{ cm}^{-1}$  (antiparallel  $\beta$ -sheet) (C, F, I). Scale bar, 100nm.

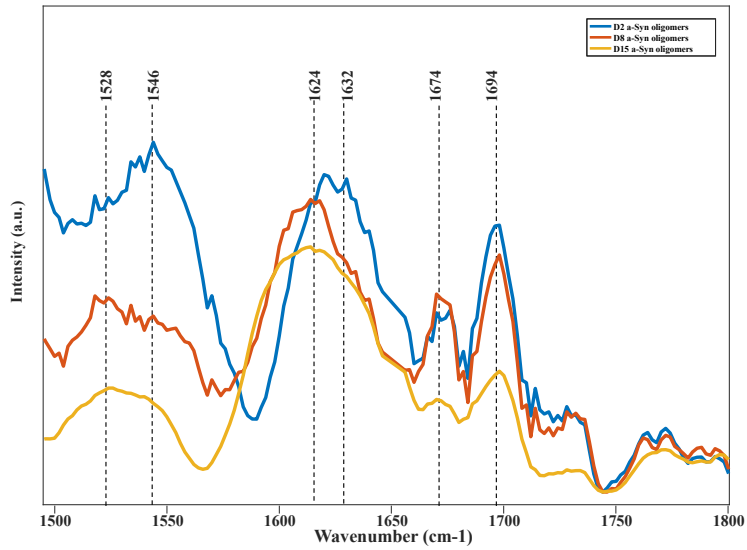

Figure S4. Averaged AFM-IR spectra collected from  $\alpha$ -Syn oligomers at D2, D8 and D15 htau were grown in the lipid-free environment.

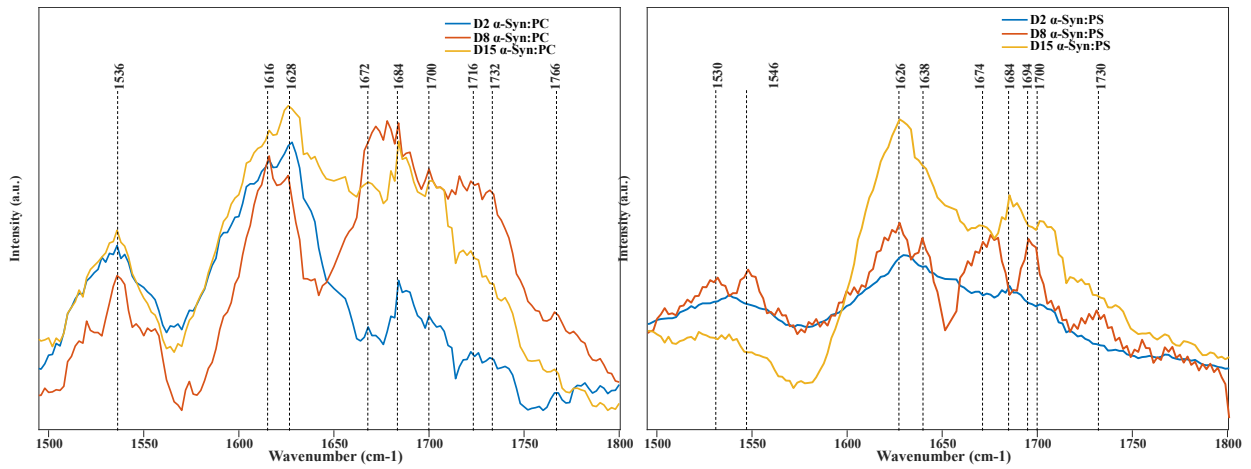

Figure S5. Averaged AFM-IR spectra collected from  $\alpha$ -Syn:PC and  $\alpha$ -Syn:PS oligomers at D2, D8 and D15.

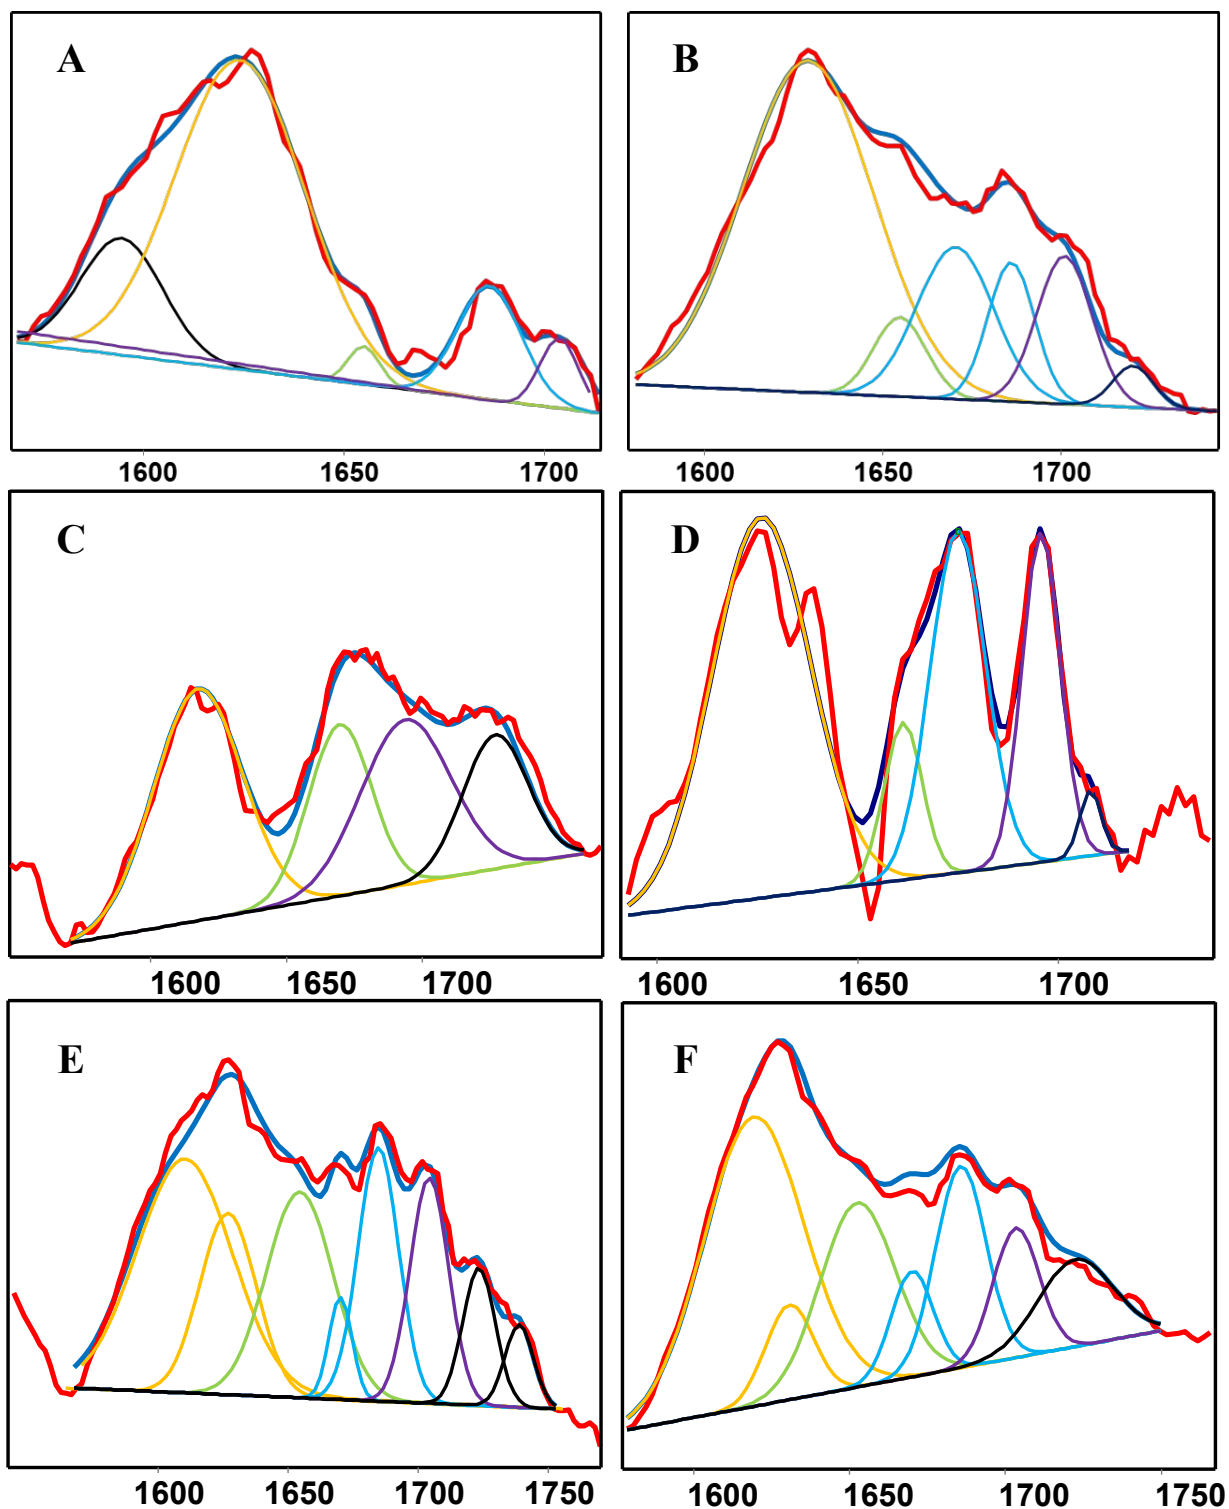

Figure S6. Averaged AFM-IR spectra and secondary structure deconvolution of amide I band of  $\alpha$ -Syn:PC (A, C, E) and  $\alpha$ -Syn:PS (B, D, F) oligomers formed at D2 (A,B), D8 (C,D) and D15 (E,F).

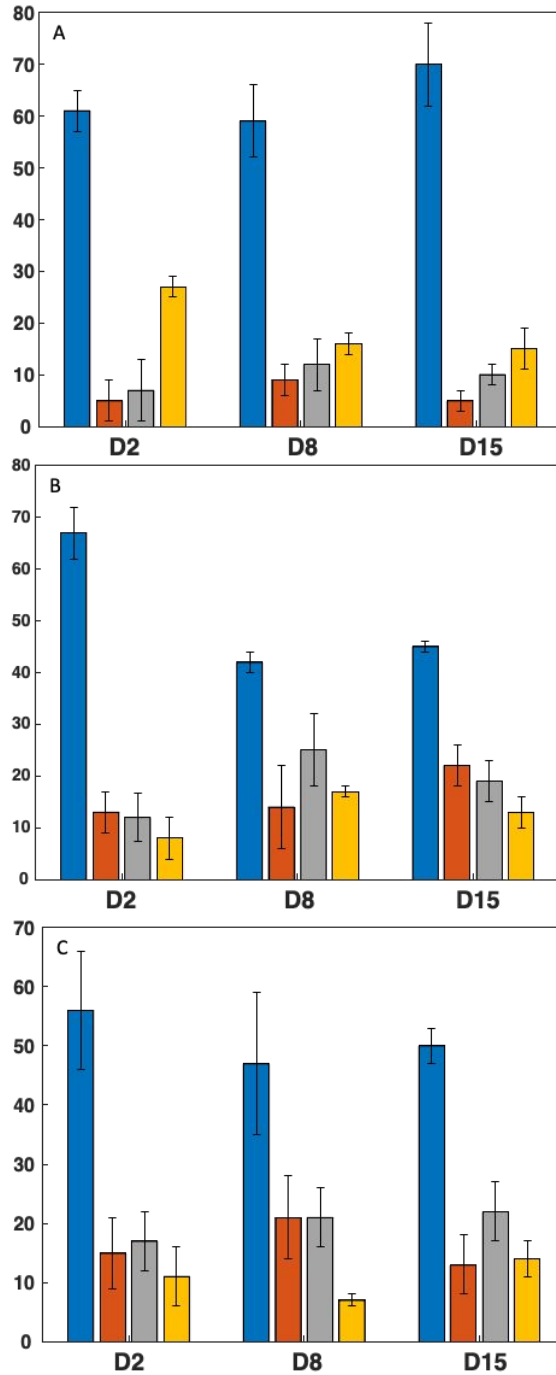

Figure S7. Bar plot of protein secondary structure of  $\alpha$ -Syn (A),  $\alpha$ -Syn:PC (B),  $\alpha$ -Syn:PS (C) oligomers on day 2, day 8 and day 15. Parallel beta sheet (blue), alpha helix and random coil (red), beta-turn (grey) and antiparallel beta sheet (yellow) percentages were calculated based on peak fitting of 3-4 different oligomers.

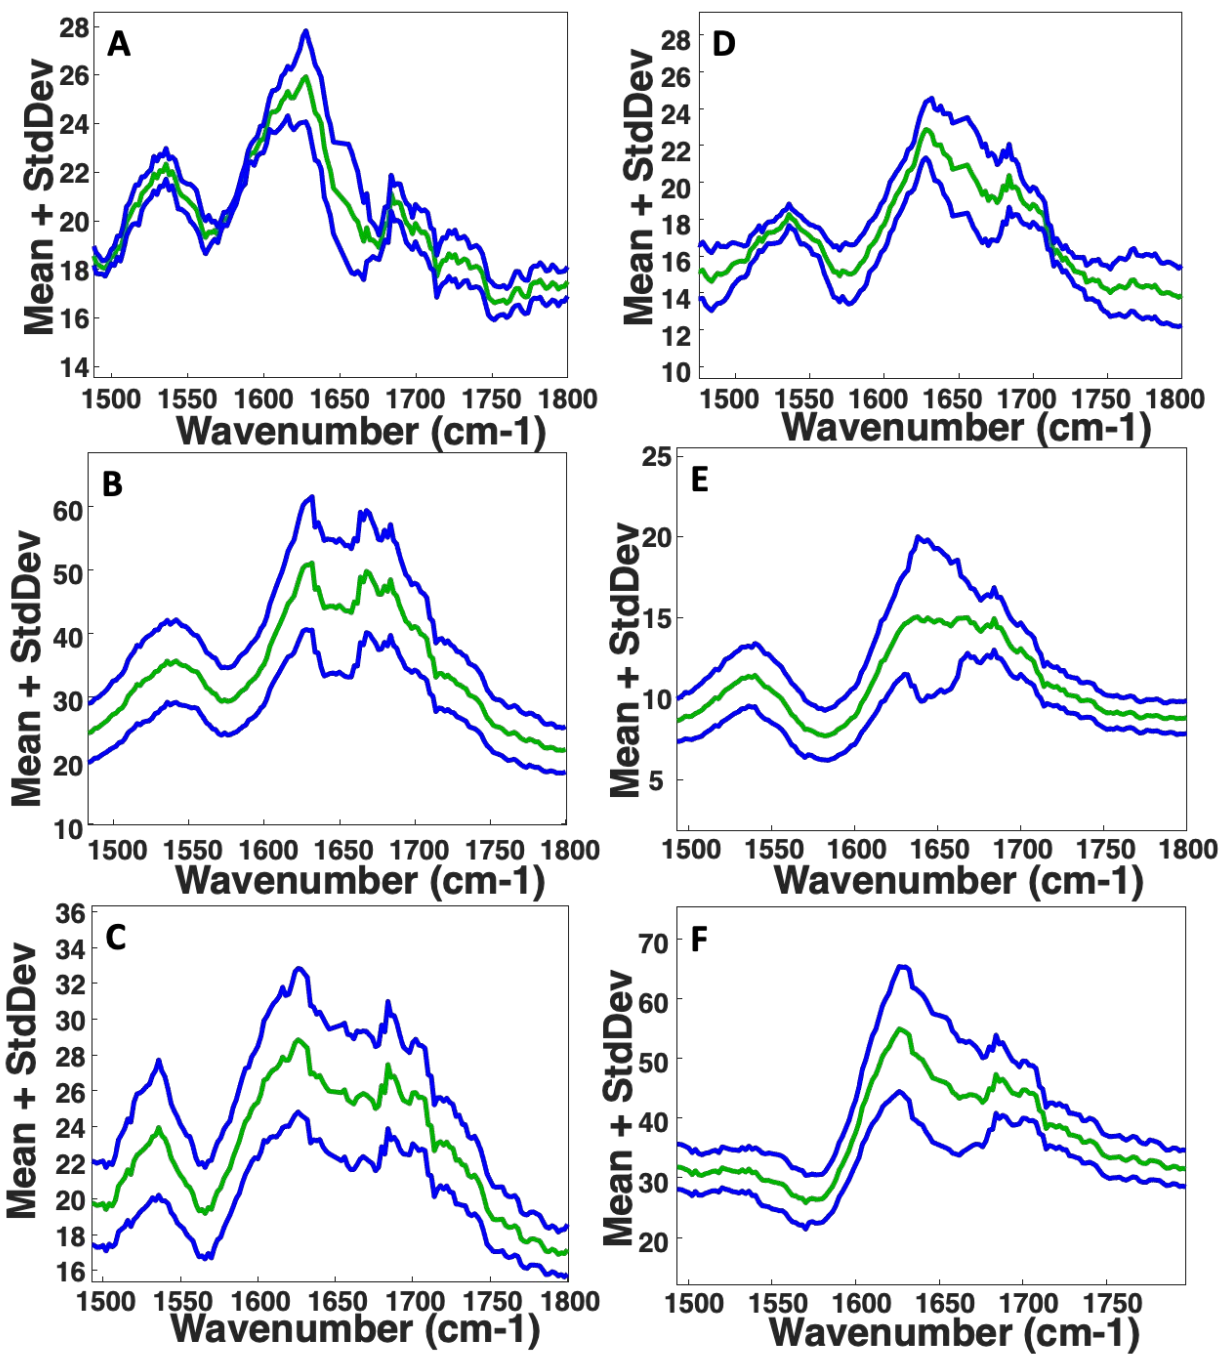

Figure S8. Mean (green) and standard deviation (blue) AFM-IR spectra of  $\alpha$ -Syn:PC (A-C) and  $\alpha$ -Syn:PS (D-F) oligomers on day 2 (A,D), day 8 (B,E) and day 15 (C, F).



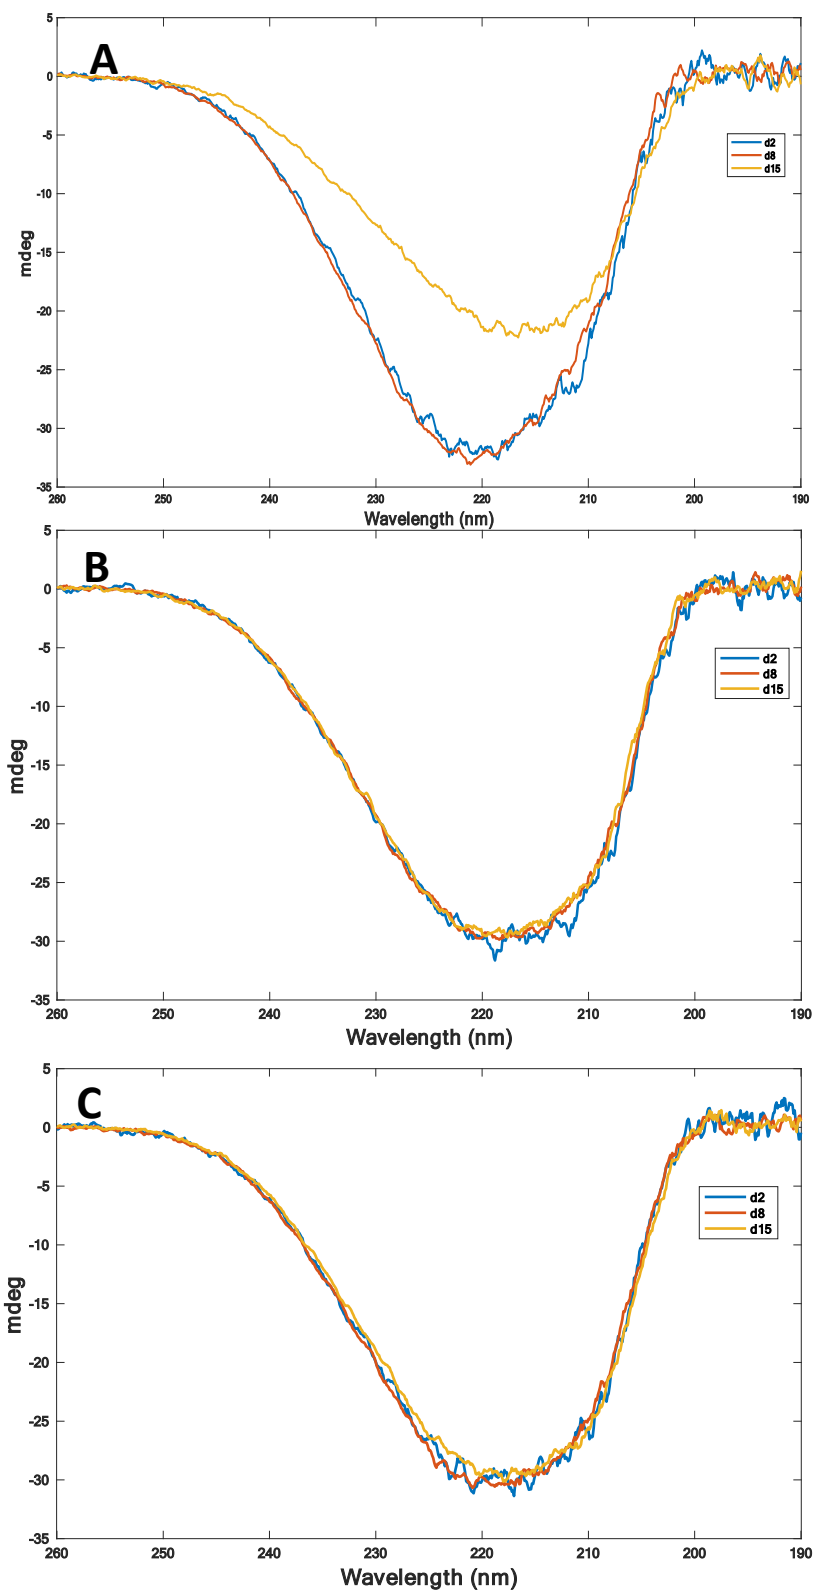

Figure S9. CD spectra of  $\alpha$ -Syn (A),  $\alpha$ -Syn:PC (B) and  $\alpha$ -Syn:PS (C) on d2 (blue), d8 (orange) and d15 (yellow).

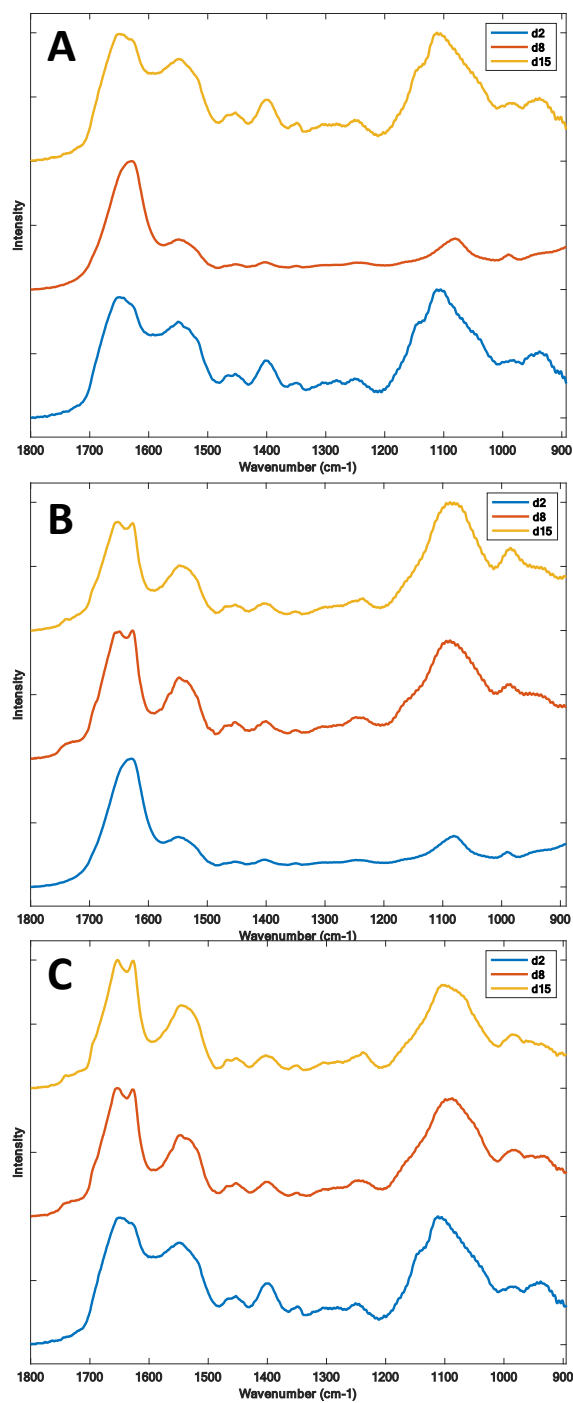

Figure S10. FT-IR spectra of  $\alpha$ -Syn (A),  $\alpha$ -Syn:PC (B) and  $\alpha$ -Syn:PS (C) on d2 (blue), d8 (orange) and d15 (yellow).
